# Supplementary material for: Hi-C metagenome sequencing reveals soil phage–host interactions
Source: PubMed Central journal article supplement (PMC10667309; doi:10.1038/s41467-023-42967-z), 2023-11-23
Supplement: 41467_2023_42967_MOESM2_ESM.pdf [file 41467_2023_42967_MOESM2_ESM.pdf]

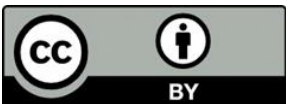

**Open Access** This file is licensed under a Creative Commons Attribution 4.0 International License, which permits use, sharing, adaptation, distribution and reproduction in any medium or format, as long as you give appropriate credit to the original author(s) and the source, provide a link to the Creative Commons license, and indicate if changes were made. In the cases where the authors are anonymous, such as is the case for the reports of anonymous peer reviewers, author attribution should be to 'Anonymous Referee' followed by a clear attribution to the source work. The images or other third party material in this file are included in the article's Creative Commons license, unless indicated otherwise in a credit line to the material. If material is not included in the article's Creative Commons license and your intended use is not permitted by statutory regulation or exceeds the permitted use, you will need to obtain permission directly from the copyright holder. To view a copy of this license, visit <http://creativecommons.org/licenses/by/4.0/>.

## REVIEWER COMMENTS

### Reviewer #1 (Remarks to the Author):

The publication by Wu et al., investigate microbe-virus interactions in soil and the impact of moisture on those interactions. For this purpose, they take soil samples and study them in laboratory under dry and wet conditions. They then used a combination of metagenomic, metatranscriptomic and proximity ligation (3C/HiC) methods to study those samples.

They found an increase of viral copies in dry conditions associated with a lower transcriptional activity compared to wet conditions. Their results suggest that lytic cycles are favored under wet conditions while lysogenic are prevalent in dry conditions. The findings could be interesting, and the experimental design is original.

However, the overall conclusion of the authors appears difficult to be generalized as it only concerns 19 of the 479 vOTUs detected (between 5.3% to 15% of the total viral sequence abundance detected in the samples). In general, the results appear weak, and I would suggest lowering the findings and to discuss this in the conclusion. Some points also need to be clarified and some important controls are lacking.

### Major Comments:

- First of all, I could not find a link to have access to raw proximity ligation data. It is mandatory to provide an access to these data to assess their quality. The link provided (<https://data.pnl.gov/group/7/nodes/publication/34802>) is not valid.

- In regards of reproducibility and open science, authors should also provide their assemblies by submitting them to NCBI or other databases. By doing this, the scientific community will be able to reproduce the results.

- Line 113: "We identified 148 unique MAGs (< 9% contamination), spanning nine bacterial phyla". What proportion of the assemblies these 148 MAGs represent? it is important to know this statistic in order to appreciate the generalization of the results.

- Very few statistics are provided concerning the data (size of the assemblies, mapping back rate, proximity ligation). It appears extremely difficult to evaluate the quality of their HiC data (raw reads, mapping rate, 3D ratio, noise signal). Indeed, no matrices are provided, and it is impossible to evaluate

the noise signal encompass in their HiC data. Authors should, at least, provide a matrix of the different MAGs obtained (<https://journals.asm.org/doi/10.1128/MRA.01523-19>).

- Authors should also compare Shotgun and HiC data. Is there particular biases in term of contigs coverage concerning the different libraries? a PCA analysis or other types of analysis in order to compare the different libraries would allow to reinforce the reproducibility of their results. How the different vOTUs behave in general depending on the different conditions? how the replicate overlap?

- Line 98 : “Hi-C sequencing resulted in 118 unique, high-confidence phage-host pairs”. From how many reads authors have obtained this number of linkages? This number appears very low.

- In the same way, authors state in the Methods section: “The virus-host pairs linked by Hi-C reads were subjected to a series of aggressive filtering to remove false positives. The first-round filtering criteria include the following: 1) at least two Hi-C reads linking the virus and host MAG ...” . How a filter at only 2 contacts can be an aggressive filtering step ?

- Line 99: “Viruses belonging to 19 of the 479 detected vOTUs were assigned to their respective host metagenome assembled genomes”. If I understand well the data and the table (that are not easy to understand); this 19 vOTUs are, for most of them, assigned as low-quality draft by VIBRANT. Therefore, it appears difficult to propose general rules of phages behavior solely based on 19 contigs representing low-quality phages genomes.

- Is there a possibility that the characterized bacterial host are the most abundant organisms of their samples? is there a correlation between the number of host and the host and/or the virus abundancy? indeed, highly abundant sequences will be more prone to noise signal and, therefore, to false positive detection.

- Line 168: “We calculated the average viral copies per host (VPH) to represent the degree of phage infection per host population.” While their calculation based on HiC links could be interesting, it is somehow peculiar that this value varies from 0 to 1.5 ... I would have expected a much higher value for lytic phages. Could the authors perform the same kind of calculations using Shotgun reads and compare those values?

Minor comments:

- Line 95: ref 23 is not the appropriate one to cite HiC applied to metagenomic as it is the first HiC publication on Human

Martial MARBOUTY

Reviewer #2 (Remarks to the Author):

The study showcases how Hi-C sequencing data can be used to explore virus-host linkages in soils. According to the text, the aim of the experiment was to explore phage lifestyle comparing wet vs dry soils. However, the experimental design included two sampling points: before and after a 14-days incubation period. The replicates (n=3) sampled at the end were not watered (dry soil treatment) and compared with the replicates (n=3) sampled at the beginning when water holding capacity was 75%. Ideally, a control condition made of wet soil should be considered and sampled at the end of the experiment together with the dry soil treatment. Without that, the experiment was not accounting for the incubation time factor. Therefore, the conclusions presented to the readers may not be fully supported by the results observed.

To my knowledge this is the first study to apply Hi-C sequencing to soil. In terms of sequencing methods, may be worth exploring the data obtained to highlight methodological aspects and possibilities of using Hi-C sequencing for soil communities. So it may be possible to restructure the focus of the message, to tone down the conclusions and avoid direct dry vs wet comparisons given the experimental limitation, and instead try to emphasise the methodological aspect of analysing Hi-C sequencing applied to soil environmental DNA. Below I provide comments and suggestions with the intention to help to improve the study.

Would be helpful to improve Fig S1 to make more clear the experimental and computational steps used, including how each dataset (metagenome, metatranscriptome and Hi-C) was used in the study. Maybe this figure could be moved to main text.

It is mentioned about computational methods currently used to predict virus-host linkages (L51-54). Why not applying those to the data to help the community providing evidence on how much virus-host

assignments can be improved with Hi-C approach? Let's say for example that by running these computational predictions for the virus-host linkages detected with Hi-C you get no host assigned to most (or few) of these viruses(?). Including this kind of analysis will help to emphasise the point mentioned in the Introduction, and exploring ideas like that may help to find new focus for the message.

The metagenomes were obtained from 0.25g of soil while the Hi-C sequencing was obtained from suspensions of 5g of soil using water. So discrepancies are expected when comparing diversity of viruses and host between metagenomes and Hi-C sequencing. They can arise mainly i) because of the difference in the amount of soil sampled (0.25g vs 5g), and ii) because only extractable viruses and host could be captured by Hi-C sequencing. Would be important to discuss this limitation.

How the viral contigs from Hi-C sequencing data were identified? Was it in the same way as the contigs from the metagenomes? MAGs from metagenomes were not recovered?

How was lysogeny inferred?

The manuscript might benefit of using the virocell concept.

L24: (and elsewhere): Is it 100% safe to generalise using the term 'infection' based only on Hi-C? Would be important to discuss that.

L367: Provide more details about the method used to recover MAGs.

L379: Do you mean 'min' score of 0.5?

L429-430: Wouldn't it be easier for the reader if V and H were simply called as vOTU and host abundances, respectively?

L462: clarify here that abundance refers to MAG activity/transcript?

L388: please clarify the tools used for the clustering step (was it the same as in L396?)

L391: provide more details on how the vOTU proteomic tree was constructed.

Figure 4: consider converting back to natural numbers as they are more biologically informative than log values. Have you also tried to correlate the activity/transcripts?

1 **REVIEWER COMMENTS**

2  
3 Reviewer #1 (Remarks to the Author):

4  
5 The publication by Wu et al., investigate microbe-virus interactions in soil and the impact of  
6 moisture on those interactions. For this purpose, they take soil samples and study them in  
7 laboratory under dry and wet conditions. They then used a combination of metagenomic,  
8 metatranscriptomic and proximity ligation (3C/HiC) methods to study those samples.  
9 They found an increase of viral copies in dry conditions associated with a lower transcriptional  
10 activity compared to wet conditions. Their results suggest that lytic cycles are favored under wet  
11 conditions while lysogenic are prevalent in dry conditions. The findings could be interesting, and  
12 the experimental design is original.

13 **Reply:** We thank the reviewer for this encouraging comment and all the valuable suggestions  
14 below.

15  
16  
17 1. However, the overall conclusion of the authors appears difficult to be generalized as it only  
18 concerns 19 of the 479 vOTUs detected (between 5.3% to 15% of the total viral sequence  
19 abundance detected in the samples). In general, the results appear weak, and I would suggest  
20 lowering the findings and to discuss this in the conclusion. Some points also need to be clarified  
21 and some important controls are lacking.

22 **Reply:** We added a section to the discussion to address this question as follows:

23 “Therefore, although CRISPR matching and other current bioinformatic approaches are valuable  
24 for revealing potential phage-host interactions<sup>5-7,16</sup>, they are deficient in the identification of  
25 specific hosts that phage are infecting at the time of sampling. The Hi-C approach provides an  
26 important advance for soil microbial ecology by chemically linking phages to their bacterial host  
27 cells and generating experimental evidence of infection at the time of sampling. We  
28 acknowledge, however, that both of these approaches are subject to under-sampling considering  
29 the high diversity of soil phages<sup>2</sup>. With deeper sequencing, we anticipate that there would be  
30 some overlap between phages detected using the two approaches. Currently, the combination of  
31 both methods is complementary and provides better coverage of soil phages than using only one  
32 approach. We also acknowledge that the Hi-C approach does not detect all possible phage-host  
33 pairs in complex soil samples because it relies on the extraction of host cells and their associated  
34 phage from the bulk soil matrix prior to sequencing. This could be a reason for the lower relative  
35 abundance of Hi-C-detected host-associated phages in this soil study (5.3% to 15.0%) compared  
36 to that in other systems that have used this approach to date; such as the human gut (~94%,  
37 assigned to MAG)<sup>14</sup> and wastewater treatment plants (~37%)<sup>25</sup>. The lower proportion of infected  
38 hosts in soil implies that a large proportion of the bacterial hosts were not extracted from the soil  
39 matrix. Alternatively, a higher fraction of the soil phage community consists of free phages that  
40 have not infected their hosts. Regardless of these shortcomings, the findings reported here  
41 emphasize the value of the Hi-C approach for identifying ‘real-time’ phage-host pairs in soil for  
42 the first time. These findings also revealed the impacts of changes in soil conditions on phage  
43 infections of the soil microbiome.”

45 We also added a sentence to the conclusions as follows: “Although this study reveals the promise  
46 of the Hi-C approach for detecting phage-host interactions in complex samples, such as soil, it  
47 has the potential to be further improved with additional experimental optimization.”  
48

49 We provided additional information on data quality control as requested in Supplementary  
50 Tables 1 and 5 and a new Supplementary Table 4.  
51

52  
53 Major Comments:

54 2. - First of all, I could not find a link to have access to raw proximity ligation data. It is  
55 mandatory to provide an access to these data to assess their quality. The link provided  
56 (<https://data.pnl.gov/group/7/nodes/publication/34802>) is not valid.

57 **Reply:** We updated the link that can be used for external access in the revised manuscript  
58 (<https://data.pnml.gov/group/nodes/publication/33336>). All the datasets are minted with DOIs as  
59 shown in Supplementary Table 1.  
60

61 3. - In regards of reproducibility and open science, authors should also provide their assemblies  
62 by submitting them to NCBI or other databases. By doing this, the scientific community will be  
63 able to reproduce the results.

64 **Reply:** Thank you for the comment. We added all the shotgun metagenome assemblies (>1 kb)  
65 to DataHub (a long-term data repository, similar to NCBI submission) and assigned a DOI to the  
66 dataset. The information is updated in the Data Availability section and Supplementary Table 1.  
67

68 4. - Line 113: “We identified 148 unique MAGs (< 9% contamination), spanning nine bacterial  
69 phyla”. What proportion of the assemblies these 148 MAGs represent? it is important to know  
70 this statistic in order to appreciate the generalization of the results.

71 **Reply:** To address this question, for each sample we calculated the percentage of detected  
72 contigs (> 1kb, read coverage > 0 in the replicate metagenome) that were binned into MAGs.  
73 The percentages range from 0.443% to 0.651%. Other published metagenome studies of soils  
74 have reported similar levels of success in extracting MAGs (e.g., doi:10.3390/genes10060424,  
75 doi: 10.1128/mra.00804-22, and doi: 10.1038/s43705-022-00100-z). The statistics included in  
76 the table below were added to Supplementary Table 1.

| <i>Sample</i>                     | <b>Total bins</b> | <b>Total binned contigs</b> | <b>% of total detected Contigs</b> |
|-----------------------------------|-------------------|-----------------------------|------------------------------------|
| <i>Post-desiccation-SM297bins</i> | 57                | 16841                       | 0.651%                             |
| <i>Post-desiccation-SM306bins</i> | 35                | 11463                       | 0.443%                             |
| <i>Post-desiccation-SM317bins</i> | 56                | 13410                       | 0.518%                             |
| <i>Pre-desiccation-SM324bins</i>  | 54                | 12547                       | 0.524%                             |
| <i>Pre-desiccation-SM330bins</i>  | 62                | 14238                       | 0.594%                             |
| <i>Pre-desiccation-SM335bins</i>  | 74                | 15276                       | 0.637%                             |



77  
78  
79  
80  
81  
82  
83  
84  
85  
86  
87  
88  
89  
90  
91  
92  
93  
94  
95  
96  
97  
98  
99  
100  
101  
102  
103  
104  
105  
106  
107  
108  
109  
110  
111  
112  
113  
114  
115  
116  
117  
118  
119  
120  
121  
122

5. - Very few statistics are provided concerning the data (size of the assemblies, mapping back rate, proximity ligation). It appears extremely difficult to evaluate the quality of their HiC data (raw reads, mapping rate, 3D ratio, noise signal). Indeed, no matrices are provided, and it is impossible to evaluate the noise signal encompass in their HiC data. Authors should, at least, provide a matrix of the different MAGs obtained (<https://journals.asm.org/doi/10.1128/MRA.01523-19>).

**Reply:** Thanks for this suggestion. We added a table containing the relevant statistics of each link. A supplementary table (Supplementary Table 4), in addition to Supplementary Table 5, was added to the revised manuscript. The statistics include the raw and processed information of contig read depths in the Hi-C data, the linked contig read depths, intra- and inter-linkage read counts and density (with and without normalization) detected in all replicate samples as suggested by the reviewer.

For the other statistic details of shotgun metagenomes, de-novo assemblies and Hi-C metagenomes, please refer to Supplementary Table 1. Each dataset is publicly available and assigned with a DOI.

For statistical details of MAG, please refer to Supplementary Table 6.

6. - Authors should also compare Shotgun and HiC data. Is there particular biases in term of contigs coverage concerning the different libraries? a PCA analysis or other types of analysis in order to compare the different libraries would allow to reinforce the reproducibility of their results. How the different vOTUs behave in general depending on the different conditions? how the replicate overlap?

**Reply:** We appreciate this comment and would like to emphasize that one vOTU or one assembled viral contig represents a unique viral population. In principle, Hi-C sequencing detects the viral populations that contain host-associated viruses. The other reviewer also brought up a nice point that these hosts are water-extractable microbes. Shotgun sequencing, ideally, detects all viral populations (i.e., both free and host-associated). So, shotgun and Hi-C data recover different though related microbial communities by just considering the principles of the two methods. That is why the results of the shotgun and Hi-C sequencing were not used for direct comparison but used for identifying viral sequences (shotgun) and screening the ones that were host-associated (Hi-C). The comparisons made in this paper were constrained to comparisons between shotgun data (e.g., the whole viral community structure in pre- and post-desiccation soils) and between Hi-C data (e.g., host-associated viruses in pre- and post-desiccation soils).

We added this explanation to the results when introducing Figure 1 (experimental design and workflow) to clarify that Hi-C and shotgun metagenomes detected related but different communities. The sentences read as follows: “To enable the targeted detection of host-associated phages, we applied Hi-C metagenomics to the same soil samples. In contrast to shotgun metagenomics, Hi-C metagenomics was able to identify the subpopulation of the total viral community that entered and infected host cells extracted from the soil. Specific phage-host interactions were captured using the Hi-C approach through chemical cross-linking of the phage

123 and host DNA molecules that were co-localized within the same cell at the time of sampling  
124 (Fig. 1).”

125  
126 We did a nonmetric multidimensional scaling (NMDS) analysis as requested by the reviewer. In  
127 Fig. S1, panel a, all viral populations (with and without host-associated viruses) detected in  
128 shotgun data were plotted against the viral populations (that were ones with host-associated  
129 viruses detected) in Hi-C data. The treatment effect was much more profound than the method  
130 difference. The same pattern was observed in panel b where the viral populations with host-  
131 associated viruses detected in shotgun and Hi-C data were plotted.

132  
133 We added the NMDS plot and results to the revised manuscript. The added text reads as follows:  
134 “Similar to the phage communities detected in the shotgun metagenomes, the host-associated  
135 phage communities in the Hi-C metagenomes were significantly impacted by soil drying ( $p \leq$   
136  $0.005$ , Fig. S1).”

137

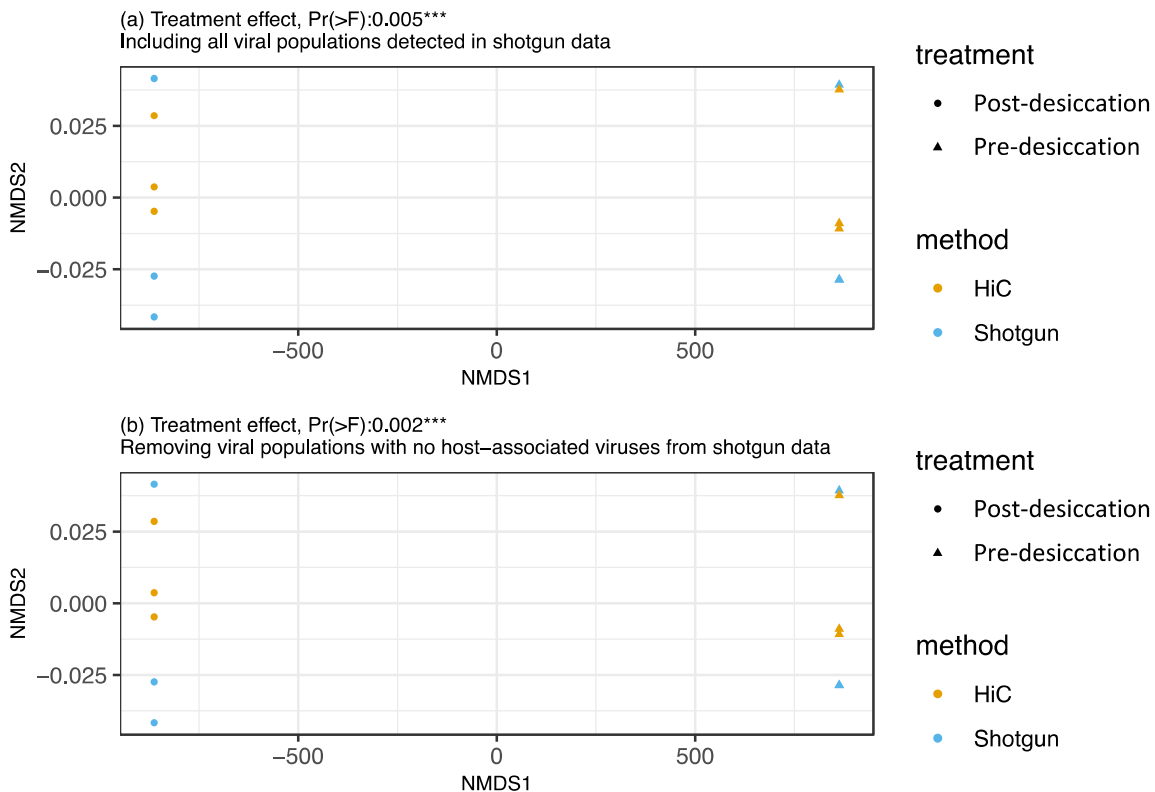

138

139

140

141 7.- Line 98 : “Hi-C sequencing resulted in 118 unique, high-confidence phage-host pairs”. From  
142 how many reads authors have obtained this number of linkages? This number appears very low.

143 **Reply:** We added the Hi-C metagenome sequencing statistics to Supplementary Table 1 and all  
144 of the other statistics such as the read depths of each linked contig and linkage density in the  
145 updated Supplementary Table 5.

146

147

148 8. - In the same way, authors state in the Methods section: “The virus-host pairs linked by Hi-C

149 reads were subjected to a series of aggressive filtering to remove false positives. The first-round  
150 filtering criteria include the following: 1) at least two Hi-C reads linking the virus and host  
151 MAG ...” . How a filter at only 2 contacts can be an aggressive filtering step?

152 **Reply:** We removed the word of “aggressive” and revised the sentence on Line 481-482 to read,  
153 “The phage-host pairs linked by Hi-C reads were screened by two rounds of filtering to remove  
154 false positives.”

155  
156

157 9. - Line 99: “Viruses belonging to 19 of the 479 detected vOTUs were assigned to their  
158 respective host metagenome assembled genomes”. If I understand well the data and the table  
159 (that are not easy to understand); this 19 vOTUs are, for most of them, assigned as low-quality  
160 draft by VIBRANT. Therefore, it appears difficult to propose general rules of phages behavior  
161 solely based on 19 contigs representing low-quality phages genomes.

162 **Reply:** We applied multiple bioinformatic tools (such as VirSorter2, DeepVirfinder, VIBRANT  
163 and CheckV, not limited to VIBRANT) to identify viral contigs as each tool can be biased due to  
164 the different means of computing the scoring matrices. For example, VIBRANT has been found  
165 with a lower F1 score when detecting some of the ssDNA viruses compared to VirSorter (v2)  
166 (doi.org/10.1186/s40168-020-00990-y). The VIBRANT paper has shown some overlaps in viral  
167 identification with the other tools (doi.org/10.1186/s40168-020-00867-0). Therefore, we applied  
168 multiple tools and did not screen the viral contigs only based on VIBRANT results.

169

170 We clarified the benefit of the ‘voting strategy’ in the Methods: “To reduce the possibility of  
171 introducing false positives, multiple viral bioinformatic detection algorithms were used,  
172 incorporating stringent or suggested cut-offs.”; “Applying this voting strategy to the results from  
173 multiple tools is intended to avoid potential limitations in one tool and minimize the detection of  
174 false positives.”

175  
176

177 10. - Is there a possibility that the characterized bacterial host are the most abundant organisms  
178 of their samples? is there a correlation between the number of host and the host and/or the virus  
179 abundancy? indeed, highly abundant sequences will be more prone to noise signal and, therefore,  
180 to false positive detection.

181 **Reply:** We examined the phage hosts that were most central in our microbial network. While  
182 some centrally located nodes did represent high abundance hosts many of the nodes also  
183 reflected low abundance hosts. Because of this we do not believe that host abundance by itself is  
184 the main reason for our observation that phage hosts are often the mostly high central in a  
185 microbial network. The overlap between phage host centrality and abundance is now shown in  
186 Table S10. The results were added and reads as the following: “We also confirmed that centrality  
187 in the network was not merely a function of a MAG being highly abundant (Table S10). Some  
188 MAGs that were central were abundant, but many were not, showing that abundance is not the  
189 main driver of centrality in our host co-abundance network.”

190

| Highly Central Nodes | Highly Abundant Contigs |
|----------------------|-------------------------|
| drep_102             | drep_7                  |
| drep_117             | drep_102                |

|         |          |
|---------|----------|
| drep_38 | drep_79  |
| drep_43 | drep_106 |
| drep_63 | drep_5   |
| drep_7  | drep_75  |
| drep_75 | drep_15  |
| drep_79 | drep_2   |
| drep_8  | drep_3   |
| drep_89 | drep_131 |

191 Highly central nodes and highly abundant contigs are shown, overlaps between these two lists  
 192 are in blue.

193  
 194  
 195 11. - Line 168: “We calculated the average viral copies per host (VPH) to represent the degree of  
 196 phage infection per host population.” While their calculation based on HiC links could be  
 197 interesting, it is somehow peculiar that this value varies from 0 to 1.5 ... I would have expected a  
 198 much higher value for lytic phages. Could the authors perform the same kind of calculations  
 199 using Shotgun reads and compare those values?

200 **Reply:** Thanks for the comment. We would like to clarify that VPH represents the average virus-  
 201 host connectivity within a given host population. For example, the value 1 could mean all  
 202 members of the host population have 1 virus associated OR 1% of the host population has 100  
 203 viruses. Both the viral copies per individual within a host population ( $V_h$ ) and the prevalence of  
 204 viral infection among members of a host population ( $F_h$ ) determine the absolute value of VPH.  $F_h$   
 205 is an important factor to consider especially in systems like soil where the microbial community  
 206 is highly diverse and the soil matrix is complex and heterogeneous. Therefore, there are chances  
 207 that a soil sample where a larger fraction of host population (higher  $F_h$ ) infected by the lysogenic  
 208 viruses (lower count in  $V_h$ ) can have a higher value of VPH. ‘a much higher value for lytic  
 209 phages’ mentioned by the reviewer maybe not always true if  $F_h$  is considered. A lower viral  
 210 transcriptional activity (low  $A_v$ ) but a higher average VPH were detected in post-desiccation soil,  
 211 suggesting a higher prevalence of lysogenic viral infection in the host population (higher  $F_h$ ).  
 212 This is one of the key take-homes in this study.

213  
 214 We expanded the results to aid the readers in understanding this discussion. The added sentences  
 215 in results reads as follows: “The average VPH and the VPHs of some host populations (e.g.,  
 216 Actinobacteria) were significantly higher after soil drying ( $p < 0.05$ , Fig. 5a). A higher average  
 217 VPH indicates that either a higher fraction of the host populations are infected by phages (more  
 218 individuals infected) or a subset of the host populations are infected by a higher number of  
 219 phages (multiple phages per individual). As such, comparing VPH alone in soils pre- and post-  
 220 desiccation can indicate a change in phage-host relationships but cannot determine the nature of  
 221 the change. Because we observed lower transcriptional activity and lower relative abundance for  
 222 the phages infecting multiple hosts in post-desiccation soil, the higher VPH after soil drying may  
 223 suggest that phage infection was more prevalent among the individuals within the host  
 224 population (more individuals infected).”

225  
 226 New sentences in the Discussion: “Therefore, we hypothesized that in desiccated soil, phages  
 227 residing inside their hosts would be preferentially retained in a lysogenic lifecycle. In support of

228 this hypothesis, the host-associated phages in post-desiccation soil had lower levels of  
229 transcriptional activity, suggestive of lysogeny. In addition, the higher average VPH in the soil  
230 after drying indicated that a higher proportion of hosts were infected by phage, and these were  
231 presumably lysogenic. By contrast, in pre-desiccation soil the phage infections resulted in a  
232 significant decrease in host abundances, suggesting that the hosts were lysed by phage via the  
233 lytic cycle. Together these results suggest that as soil dries, there is a transition of phage  
234 lifestyles from primarily lytic to lysogenic.”

235

236 As to the point of comparing shotgun and Hi-C for the VPH values, please refer to the edits on  
237 Line 76-80 in response to Comment 6 where we explained the two sequencing methods were  
238 used to capture different communities and thus the values will have different meanings that are  
239 not comparable.

240

241

242 Minor comments:

243 12. - Line 95: ref 23 is not the appropriate one to cite HiC applied to metagenomic as it is the  
244 first HiC publication on Human

245 **Reply:** Thanks for the comment. We updated the citations and included the references below.

246 Marbouty, M., Baudry, L., Cournac, A. & Koszul, R. Scaffolding bacterial genomes and probing  
247 host-virus interactions in gut microbiome by proximity ligation (chromosome capture) assay.

248 Science advances 3, e1602105 (2017).

249 Marbouty, M., Thierry, A., Millot, G. A. & Koszul, R. MetaHiC phage-bacteria infection  
250 network reveals active cycling phages of the healthy human gut. Elife 10, e60608 (2021).

251

252

253 Reviewer #2 (Remarks to the Author):

254 The study showcases how Hi-C sequencing data can be used to explore virus-host linkages in  
255 soils. According to the text, the aim of the experiment was to explore phage lifestyle comparing  
256 wet vs dry soils. However, the experimental design included two sampling points: before and  
257 after a 14-days incubation period. The replicates (n=3) sampled at the end were not watered (dry  
258 soil treatment) and compared with the replicates (n=3) sampled at the beginning when water  
259 holding capacity was 75%.

260

261

262 13. Ideally, a control condition made of wet soil should be considered and sampled at the end of  
263 the experiment together with the dry soil treatment. Without that, the experiment was not  
264 accounting for the incubation time factor. Therefore, the conclusions presented to the readers  
265 may not be fully supported by the results observed.

266 **Reply:** Thanks for the comment. We agree that the time factor is an important consideration.

267 The text in Method was edited as the following: “The incubation of soil samples under field-  
268 relevant conditions (i.e., 30°C for 2 weeks) mimicked the natural soil drying process in hot  
269 weather typical of Prosser, Washington summers.”

270

271 The text in Results was edited as the following: “The Hi-C metagenome sequencing approach  
272 was combined with shotgun metagenome and metatranscriptome sequencing to investigate how  
273 soil drying impacts phage-host interactions. Results were compared from before and after a two-

274 week drying incubation (pre- and post-desiccation, Fig. 1) that simulated summer desiccation  
275 that frequently occurs in these arid grassland soils.”

276

277 The text in Discussion was edited as the following: “We note that our experimental design and  
278 data cannot address the possibility that changes occurred over time independent of the moisture  
279 treatment, or that desiccation affected the susceptibility of hosts due to changes in outer  
280 membrane composition.”.

281

282

283 14. To my knowledge this is the first study to apply Hi-C sequencing to soil. In terms of  
284 sequencing methods, may be worth exploring the data obtained to highlight methodological  
285 aspects and possibilities of using Hi-C sequencing for soil communities. So it may be possible to  
286 restructure the focus of the message, to tone down the conclusions and avoid direct dry vs wet  
287 comparisons given the experimental limitation, and instead try to emphasise the methodological  
288 aspect of analysing Hi-C sequencing applied to soil environmental DNA. Below I provide  
289 comments and suggestions with the intention to help to improve the study.

290 **Reply:** Thanks for pointing out the novel application of Hi-C in our study. As suggested by the  
291 reviewer, we highlighted the novelty of the Hi-C sequencing approach and restructured the  
292 Introduction, Results and Discussion sections accordingly. Changes are highlighted in blue in the  
293 revised manuscript.

294

295

296 15. Would be helpful to improve Fig S1 to make more clear the experimental and computational  
297 steps used, including how each dataset (metagenome, metatranscriptome and Hi-C) was used in  
298 the study. Maybe this figure could be moved to main text.

299 **Reply:** Thanks for the suggestion. In addition to the previous Fig. S1 where we demonstrated the  
300 experimental set-up and dataset generated, we added workflow schematics to show how the  
301 shotgun metagenomes, Hi-C metagenomes and metatranscriptomes were co-analyzed as the  
302 panel b. The figure is now moved to the main text as suggested (new Fig. 1).

303

304

305 16. It is mentioned about computational methods currently used to predict virus-host linkages  
306 (L51-54). Why not applying those to the data to help the community providing evidence on how  
307 much virus-host assignments can be improved with Hi-C approach? Let's say for example that by  
308 running these computational predictions for the virus-host linkages detected with Hi-C you get  
309 no host assigned to most (or few) of these viruses(?). Including this kind of analysis will help to  
310 emphasise the point mentioned in the Introduction, and exploring ideas like that may help to find  
311 new focus for the message.

312 **Reply:** Thanks for the suggestion. We have edited the text to emphasize that the unique value of  
313 Hi-C is the ability to capture phage infections at the time of sampling by chemically linking  
314 phages that enter a host cell. We also did the spacer analysis as suggested by the reviewer and  
315 added to the results (Line 89-98) and discussion (Line 200-230).

316

317 The added results read as follows: “To demonstrate that Hi-C sequencing can capture viral  
318 infections at the time of sampling, we compared the phage-host links detected by Hi-C with  
319 those predicted by CRISPR spacer matching, which is currently the main bioinformatic method

320 for viral host prediction<sup>15,16</sup>. A total of 124 CRISPR spacers recalled from the CRISPR arrays  
321 in MAGs were matched to phage contigs, generating 121 unique phage-host links (Table S7).  
322 Although the number of phage-host links predicted by the CRISPR spacer method and detected  
323 by the Hi-C method are comparable, none of the Hi-C links were detected using the CRISPR  
324 spacer approach (Tables S5 and S7). Because the CRISPR-Cas system provides an adaptive  
325 immunity to host cells, the immunity memory based on prior viral infections<sup>17</sup> may not detect  
326 more recent or current viral infections. Hi-C sequencing overcomes this challenge by directly  
327 capturing phage-host interactions at the time of sampling.”

328  
329 The revised paragraph in the discussion (Line 200-230) reads as follows: “This is the first study  
330 to provide empirical evidence of phage-host associations in soil by applying Hi-C metagenomics  
331 to chemically link phages to their infected hosts. Previous attempts to identify hosts of soil  
332 viruses have been challenging due to the complexity of the soil environment, coupled with the  
333 vast diversity of largely uncharacterized soil viruses<sup>2,22</sup>. As a result, the current state-of-the-  
334 science has been to bioinformatically predict soil viral hosts from metagenomes<sup>5-7,16</sup>. For  
335 example, CRISPR spacer matching is one of the most widely used bioinformatic methods for  
336 phage host prediction in the absence of direct evidence<sup>15,16</sup>. This approach relies on the storage  
337 of immunity memories to prior viral infections in spacer arrays in the host DNA<sup>17</sup>. The spacers  
338 can be conserved for years in prokaryotic genomes as exact matches to the protospacer targets  
339 from past infections<sup>23</sup>. As a result, the number of spacers that the prokaryotic hosts acquire and  
340 maintain can range from 10 to 100 and the majority of the spacers acquired do not represent  
341 current viral infections<sup>24</sup>. This may partly explain why there were no overlaps in phage-host  
342 links predicted by the CRISPR matching method and those detected by Hi-C sequencing.  
343 Therefore, although CRISPR matching and other current bioinformatic approaches are valuable  
344 for revealing potential phage-host interactions<sup>5-7,16</sup>, they are deficient in the identification of  
345 specific hosts that phage are infecting at the time of sampling. The Hi-C approach provides an  
346 important advance for soil microbial ecology by chemically linking phages to their bacterial host  
347 cells and generating experimental evidence of infection at the time of sampling. We  
348 acknowledge, however, that both of these approaches are subject to under-sampling considering  
349 the high diversity of soil phages<sup>2</sup>. With deeper sequencing, we anticipate that there would be  
350 some overlap between phages detected using the two approaches. Currently, the combination of  
351 both methods is complementary and provides better coverage of soil phages than using only one  
352 approach. We also acknowledge that the Hi-C approach does not detect all possible phage-host  
353 pairs in complex soil samples because it relies on the extraction of host cells and their associated  
354 phage from the bulk soil matrix prior to sequencing. This could be a reason for the lower relative  
355 abundance of Hi-C-detected host-associated phages in this soil study (5.3% to 15.0%) compared  
356 to that in other systems that have used this approach to date; such as the human gut (~94%,  
357 assigned to MAG)<sup>14</sup> and wastewater treatment plants (~37%)<sup>25</sup>. The lower proportion of  
358 infected hosts in soil implies that a large proportion of the bacterial hosts were not extracted from  
359 the soil matrix. Alternatively, a higher fraction of the soil phage community consists of free  
360 phages that have not infected their hosts. Regardless of these shortcomings, the findings reported  
361 here emphasize the value of the Hi-C approach for identifying ‘real-time’ phage-host pairs in soil  
362 for the first time. These findings also revealed the impacts of changes in soil conditions on phage  
363 infections of the soil microbiome.”

364

365  
366 17. The metagenomes were obtained from 0.25g of soil while the Hi-C sequencing was obtained  
367 from suspensions of 5g of soil using water. So discrepancies are expected when comparing  
368 diversity of viruses and host between metagenomes and Hi-C sequencing. They can arise mainly  
369 i) because of the difference in the amount of soil sampled (0.25g vs 5g), and ii) because only  
370 extractable viruses and host could be captured by Hi-C sequencing. Would be important to  
371 discuss this limitation.

372  
373 **Reply:** We mentioned in the Methods (Line 375) that the Hi-C extraction protocol was  
374 optimized for low biomass soil samples by PHASE GENOMICS. In addition, the Hi-C  
375 sequencing reads were only mapped to the de-novo assemblies of the shotgun metagenome (Line  
376 407-409). Although Hi-C may assign more viruses to hosts in the 5g of soil, we only include the  
377 virus-host links that were detected in the viral sequences identified in the shotgun metagenomes  
378 sequenced from the 0.25g of soil. Therefore, the impact of the amount of soil should not be a  
379 major driver in our results.

380  
381 We added sentences to the results and discussion acknowledging the second point. The added  
382 sentences read as follow: “In contrast to shotgun metagenomics, Hi-C metagenomics was able to  
383 identify the subpopulation of the total viral community that entered and infected host cells that  
384 were extracted from the soil.’. ‘We also acknowledge that the Hi-C approach does not detect all  
385 possible phage-host pairs in complex soil samples because it relies on the extraction of host cells  
386 and their associated phage from the bulk soil matrix prior to sequencing.”

387  
388  
389 18. How the viral contigs from Hi-C sequencing data were identified? Was it in the same way as  
390 the contigs from the metagenomes? MAGs from metagenomes were not recovered?

391  
392 **Reply:** We re-arranged and added more details to the Method section (Line 391-430) and added  
393 a workflow diagram to Fig. 1 to address the question in the revised manuscript.

394  
395 To briefly explain here, Hi-C sequencing only recorded which reads were linked. The Hi-C reads  
396 were mapped to the de-novo assemblies of the shotgun metagenome. The shotgun assemblies  
397 were subjected to viral contig identification. When the linked Hi-C reads were mapped to one  
398 viral contig and one bacterial contig, a virus-host pair was identified. Viral contigs were not  
399 identified by Hi-C sequencing but by the shotgun metagenome. Because of the linkage  
400 information from Hi-C sequencing, the MAGs obtained from shotgun metagenome can be  
401 refined.

402  
403  
404 19. How was lysogeny inferred?

405  
406 **Reply:** The lysogeny in post-desiccation soil was inferred by 1) lower transcriptional profiles of  
407 the host-associated viruses and 2) non-lytic impact on host populations relative to what was  
408 observed in pre-desiccation soils. This information was synthesized in the following sentences  
409 on Line 236-241, “Therefore, we hypothesized that in desiccated soil, phages residing inside  
410 their hosts would be preferentially retained in a lysogenic lifecycle. In support of this hypothesis,



411 the host-associated phages in post-desiccation soil had lower levels of transcriptional activity,  
412 suggestive of lysogeny. In addition, the higher average VPH in the soil after drying indicated that  
413 a higher proportion of hosts were infected by phage, and these were presumably lysogenic. By  
414 contrast, in pre-desiccation soil the phage infections resulted in a significant decrease in host  
415 abundances, suggesting that the hosts were lysed by phage via the lytic cycle. Together these  
416 results suggest that as soil dries, there is a transition of phage lifestyles from primarily lytic to  
417 lysogenic.”

418  
419

420 20. The manuscript might benefit of using the virocell concept.

421

422 **Reply:** Thanks for the suggestion. We also considered this and recognize that the concept of the  
423 virocell also emphasizes the fate of the host cell after being infected by viruses  
424 ([doi.org/10.1038/ismej.2012.110](https://doi.org/10.1038/ismej.2012.110)). However, our study does not have relevant data to define the  
425 metabolic status of each infected host cell and may introduce more uncertainties if we use the  
426 virocell concept. These are our concerns but we are also open to more reviewer suggestions for  
427 better incorporation of this concept in this manuscript.

428

429

430 21. L24: (and elsewhere): Is it 100% safe to generalise using the term 'infection' based only on  
431 Hi-C? Would be important to discuss that.

432

433 **Reply:** Since Hi-C captured viruses that had entered the host cells via the chemical links  
434 between the viral and host DNAs, those host cells by definition were infected by the detected  
435 viruses. ‘infection’ has been used in previous studies where the Hi-C was applied to capture the  
436 virus-host links in the human gut ([doi.org/10.7554/eLife.60608](https://doi.org/10.7554/eLife.60608)). ‘infect’ was used in another Hi-  
437 C application to a rumen study ([doi: 10.1186/s13059-019-1760-x](https://doi.org/10.1186/s13059-019-1760-x)). To avoid confusion, we  
438 added a sentence in the text (Line 77-80) to define infection in this manuscript. The sentences  
439 read as the following: “In contrast to shotgun metagenomics, Hi-C metagenomics was able to  
440 identify the subpopulation of the total viral community that entered and infected host cells  
441 extracted from the soil. Specific phage-host interactions were captured using the Hi-C approach  
442 through chemical cross-linking of the phage and host DNA molecules that were co-localized  
443 within the same cell at the time of sampling (Fig. 1).”

444

445

446 22. L367: Provide more details about the method used to recover MAGs.

447

448 **Reply:** We added more information as suggested on Line 419-423: “Briefly, Hi-C mappings  
449 were filtered with a minimum score of 20 after removing the Hi-C metagenomic paired-end  
450 reads that were non-uniquely mapped to contigs or mapped to the same contig (length of the  
451 contig > 1 kb). The filtered Hi-C mappings were then used to generate a contig-contig interaction  
452 network. These contigs were further clustered into genome bins using a proprietary Markov  
453 chain Monte Carlo (MCMC)-based algorithm<sup>60</sup>. The genome bins or MAGs were assessed for  
454 quality using CheckM (v1.2.0)<sup>60</sup>.”

455

456  
457 23. L379: Do you mean 'min' score of 0.5?  
458

459 **Reply:** Yes, we now corrected it.  
460

461  
462 24. L429-430: Wouldn't it be easier for the reader if V and H were simply called as vOTU and  
463 host abundances, respectively?  
464

465 **Reply:** Thank you for the suggestion. We edited it accordingly (Line 480-482).  
466

467  
468 25. L462: clarify here that abundance refers to MAG activity/transcript?  
469

470 **Reply:** The reviewer is correct that transcript data was used to construct the co-occurrence  
471 network. We chose to use the transcript because we had metatranscriptomic data from a wider  
472 range and number of samples than metagenomic data. We chose to use the single-copy  
473 housekeeping gene *argS* as a proxy because it was present in a majority of the MAGs. We edited  
474 the text (Line 521-524) to clarify this as follows, "Because we had metatranscriptomic data from  
475 a wider range and number of samples than metagenomic data, the microbial co-occurrence  
476 networks were constructed from metatranscriptomic data to maximize the number of input  
477 samples. The *argS* gene was selected as the proxy because it is a housekeeping gene that is  
478 single-copy in most organisms and was present in a majority of the MAGs."  
479

480  
481 26. L388: please clarify the tools used for the clustering step (was it the same as in L396?)  
482

483 **Reply:** It is not a bioinformatic tool but part of the viral workflow that was previously published.  
484 We added the GitHub link to the documentation of the clustering method in addition to the  
485 citation (Line 435-436).  
486

487  
488 27. L391: provide more details on how the vOTU proteomic tree was constructed.  
489

490 **Reply:** We added more information on how the tool works. The added sentences are the  
491 following: "In brief, the pairwise similarities of the vOTU representative sequences were  
492 computed based on the tBLASTx results. The distance between the viral sequences was  
493 demonstrated in a dendrogram that was further clustered using the neighbor-joining algorithm."  
494 More details can be found in the ViPTree citation specified.  
495

496  
497 28. Figure 4: consider converting back to natural numbers as they are more biologically  
498 informative than log values. Have you also tried to correlate the activity/transcripts?  
499

500 **Reply:** Thank you for the comment. VPH values were log-transformed in panels b and c to make  
501 it easier for readers to compare the different regression results in pre- and post-desiccation soils.

502 We agree that the natural numbers are also informative, so we kept the natural numbers of VPH  
503 values detected in each unique host taxon in panel a as mentioned by the reviewer.  
504 If we understand the second comment correctly, the reviewer suggests correlating the VPH with  
505 the host activity/transcript. The number of host bin transcripts could be hard to interpret here  
506 because different metabolic and/or replication activities of the same host can respond differently  
507 pre- and post-soil desiccation. Given the datasets we have, the host activity assessment is out of  
508 the scope of this study. We acknowledge the value of this correlation suggested by the reviewer  
509 that would be interesting to investigate in future study or in a less complex or tractable  
510 microbiome. It is not possible to do this type of analysis on viral activity because, as we have  
511 demonstrated, some viruses infect multiple hosts, and thus there is not the one-to-one  
512 relationship required for regression analysis.

## REVIEWER COMMENTS

Reviewer #1 (Remarks to the Author):

The revised version of the manuscript by Wu et al., is a better and clearer version. I thank the authors to answer many of my comments/questions. The different parts of the results sections are easier to understand, especially about the VPH ratio. The overall discussion is also more nuanced and open to different interpretations.

I still have two comments concerning the publication:

1- It still remains extremely difficult to have a direct and global overview of the quality of the HiC data. All the tables are full of data and difficult to understand. I re-ask my previous question as it is really important to have these data in order to have a global overview of the quality: "Very few statistics are provided concerning the data (size of the assemblies, mapping back rate, proximity ligation). It appears extremely difficult to evaluate the quality of their HiC data (raw reads, mapping rate, 3D ratio, noise signal). Indeed, no matrices are provided, and it is impossible to evaluate the noise signal encompass in their HiC data. Authors should, at least, provide a matrix of the different MAGs obtained as in the following publication. (<https://journals.asm.org/doi/10.1128/MRA.01523-19>)."

Could the authors provide a simple table with the 3D ratio for each HiC library and a contact map encompassing the different reconstructed MAGs as a supplementary Figures ?

authors can have a look here : <https://journals.asm.org/doi/10.1128/MRA.01523-19>

2- Line 77: "Hi-C metagenomics was able to identify the subpopulation of the total viral community that entered and infected host cells extracted from the soil." This affirmation needs to be demonstrated. Indeed, several HiC related publications on metagenomes and cited by the authors have emphasized the fact that HiC could also capture free viral particles. Authors should lower this affirmation or remove this sentence.

Martial Marbouty

Reviewer #2 (Remarks to the Author):

Authors have carefully addressed the comments, clarified the limitations and improved the initial version. Their study will contribute to future research applications of Hi-C to track virus-host interactions in soils. (obs: the new Fig S1 needs more information in the legend - only two points for shotgun pre-desiccation?)

## REVIEWER COMMENTS

Reviewer #1 (Remarks to the Author):

The revised version of the manuscript by Wu et al., is a better and clearer version. I thank the authors to answer many of my comments/questions. The different parts of the results sections are easier to understand, especially about the VPH ratio. The overall discussion is also more nuanced and open to different interpretations.

I still have two comments concerning the publication:

1- It still remains extremely difficult to have a direct and global overview of the quality of the HiC data. All the tables are full of data and difficult to understand. I re-ask my previous question as it is really important to have these data in order to have a global overview of the quality: "Very few statistics are provided concerning the data (size of the assemblies, mapping back rate, proximity ligation). It appears extremely difficult to evaluate the quality of their HiC data (raw reads, mapping rate, 3D ratio, noise signal). Indeed, no matrices are provided, and it is impossible to evaluate the noise signal encompass in their HiC data. Authors should, at least, provide a matrix of the different MAGs obtained as in the following publication. (<https://journals.asm.org/doi/10.1128/MRA.01523-19>)."

Could the authors provide a simple table with the 3D ratio for each HiC library and a contact map encompassing the different reconstructed MAGs as a supplementary Figures ?

authors can have a look here : <https://journals.asm.org/doi/10.1128/MRA.01523-19>

2- Line 77: "Hi-C metagenomics was able to identify the subpopulation of the total viral community that entered and infected host cells extracted from the soil." This affirmation needs to be demonstrated. Indeed, several HiC related publications on metagenomes and cited by the authors have emphasized the fact that HiC could also capture free viral particles. Authors should lower this affirmation or remove this sentence.

Martial Marbouty

Reviewer #2 (Remarks to the Author):

Authors have carefully addressed the comments, clarified the limitations and improved the initial version. Their study will contribute to future research applications of Hi-C to track virus-host interactions in soils. (obs: the new Fig S1 needs more information in the legend - only two points for shotgun pre-desiccation?)

## REVIEWER COMMENTS

Reviewer #1 (Remarks to the Author):

The revised version of the manuscript by Wu et al., is a better and clearer version. I thank the authors to answer many of my comments/questions. The different parts of the results sections are easier to understand, especially about the VPH ratio. The overall discussion is also more nuanced and open to different interpretations.

**Response: Thanks for your positive feedback.**

I still have two comments concerning the publication:

1- It still remains extremely difficult to have a direct and global overview of the quality of the HiC data. All the tables are full of data and difficult to understand. I re-ask my previous question as it is really important to have these data in order to have a global overview of the quality: "Very few statistics are provided concerning the data (size of the assemblies, mapping back rate, proximity ligation). It appears extremely difficult to evaluate the quality of their HiC data (raw reads, mapping rate, 3D ratio, noise signal). Indeed, no matrices are provided, and it is impossible to evaluate the noise signal encompass in their HiC data. Authors should, at least, provide a matrix of the different MAGs obtained as in the following publication. (<https://journals.asm.org/doi/10.1128/MRA.01523-19>)."

Could the authors provide a simple table with the 3D ratio for each HiC library and a contact map encompassing the different reconstructed MAGs as a supplementary Figures ?

authors can have a look here : <https://journals.asm.org/doi/10.1128/MRA.01523-19>

**Response: We summarized the quality matrix/index suggested by the reviewer and added them to the new Supplementary Table 1 (Table S1). Quality indexes per data package/datatype were included in each sheet of the excel file (Supplementary Table 1A-E).**

- The '3D ratio' per Hi-C metagenome library is in Column F of Supplementary Table 1C; We referred to the definition of '3D ratio' specified in Marbouty, Martial, et al. (2021) [<https://doi.org/10.7554/eLife.60608>] and generated the ratio using the same criteria.
- The other related statistics for each Hi-C library can be found in Columns G to J of Supplementary Table 1C, including the fraction of read pairs from the same strand, the fraction of duplicate reads, fractions of informative read pairs (MAPQ > 0, not PCR duplicates, and map to different contigs or >10 Kbp apart; cells L51-62), the fraction of intercontig read pairs.
- The number of quality reads in each shotgun and Hi-C metagenome is in Column E of Supplementary Table 1A and Column E of Supplementary Table 1C;
- The number of total and viral contigs (or 'size of the assemblies') and N50 (if applied) per co-assembled shotgun metagenomes in Rows 5-7 of Supplementary Table 1B;
- The number of bins and related statistics per sample is in Rows 11-16 of Supplementary Table 1B.

**The contact map per sample was generated and included in Supplementary Figure 2 as suggested.**

2- Line 77: "Hi-C metagenomics was able to identify the subpopulation of the total viral community that entered and infected host cells extracted from the soil." This affirmation needs to be demonstrated. Indeed, several HiC related publications on metagenomes and cited by the authors have emphasized the fact that HiC could also capture free viral particles. Authors should lower this affirmation or remove this



sentence.

**Response: Thanks for the comment. The sentence was deleted as suggested.**

Reviewer #2 (Remarks to the Author):

Authors have carefully addressed the comments, clarified the limitations and improved the initial version. Their study will contribute to future research applications of Hi-C to track virus-host interactions in soils. (obs: the new Fig S1 needs more information in the legend - only two points for shotgun pre-desiccation?)

**Response: Thanks for the positive comment.**

**Two of the shotgun pre-desiccation data points overlapped in the NMDS plot. Instead, we now demonstrated the sample clustering in dendrograms. More details of the plots were added to the legend as suggested.**

## REVIEWERS' COMMENTS

Reviewer #1 (Remarks to the Author):

I have no more comments concerning the manuscript and i thanks the authors to have provided the different asked data.

Martial Marbouty
