# Supplementary material for: Hi-C metagenome sequencing reveals soil phage–host interactions
Source: PubMed Central journal article supplement (PMC10667309; doi:10.1038/s41467-023-42967-z), 2023-11-23
Supplement: 41467_2023_42967_MOESM3_ESM.pdf [file 41467_2023_42967_MOESM3_ESM.pdf]

## Description of Additional Supplementary Files

**Supplementary Data 1:** Sequencing statistics and quality matrices of the five released datasets. Supplementary Data 1A Sequencing depth of the shotgun metagenomes; Supplementary Data 1B Assembly statistics of shotgun metagenomes; Supplementary Data 1C Sequencing depth of Hi-C metagenomes and the quality matrix of Hi-C reads mapping back to the shotgun metagenome assemblies; Supplementary Data 1D Description of the data package including the identified phage-host links; Supplementary Data 1E Sequencing depth of the metatranscriptomes. The five datasets are packaged and minted with DOIs.

**Supplementary Data 2:** Dereplicated viral contigs detected from metagenome assemblies. The dataset includes length, vOTU assignment and results from different bioinformatic tools (Demovir<sup>67</sup>, DeepVirFinder<sup>53</sup>, VirSorter<sup>51</sup>, VIBRANT<sup>52</sup> and CheckV<sup>54</sup>) for each of the dereplicated viral contigs identified from metagenome assemblies.

**Supplementary Data 3:** Coverage estimates for viral contigs in replicate metagenomes. Breadth and depth of coverage of each of the dereplicated viral genomes in the replicate metagenomes were calculated. When a viral contig had a breadth of coverage in a metagenome lower than 50% (highlighted with asterisks or '\*'), the respective depth of the coverage was adjusted to zero.

**Supplementary Data 4:** Read coverage and density of all unfiltered linkages detected in by Hi-C metagenome sequencing. The statistics of all unfiltered linkages include the raw and processed contig read depth, the linked contig read depth, intra- and inter-linkage read count and density (with and without normalization) in Hi-C metagenomes generated from each replicate sample.

**Supplementary Data 5:** Phage-host pairs informed by Hi-C metagenome sequencing. The detected phage-host pairs were quality filtered according to the method described in Uritskiy et al. 2021<sup>73</sup> (details in Methods).

**Supplementary Data 6:** Taxonomic assignments of the metagenome-assembled genomes (MAGs). Data include the binning statistics, clustering results and taxonomic assignments of the MAGs.

**Supplementary Data 7:** Phage-host links predicted using the CRISPR spacer matching method. The phage contigs were matched to the CRISPR spacers retrieved from the MAGs.

**Supplementary Data 8:** Node statistics for the microbial co-occurrence networks. The centrality indices of each node (representing a dereplicated MAG) within the three microbial co-occurrence networks are shown.

**Supplementary Data 9:** Differential abundances in *argS* gene transcripts. A total of 30 metatranscriptomes were generated along the course of soil pre-incubation and desiccation. The transcript abundances of *argS* genes were calculated from each of the metatranscriptome data and normalized across the datasets.
